# Supplementary material for: phylotaR: An Automated Pipeline for Retrieving Orthologous DNA Sequences from GenBank in R
Source: MDPI journal article supplement (doi:10.3390/life8020020), 2018-06-05
Supplement: s1 [file s1]

No. clusters 0 30 60 90 120

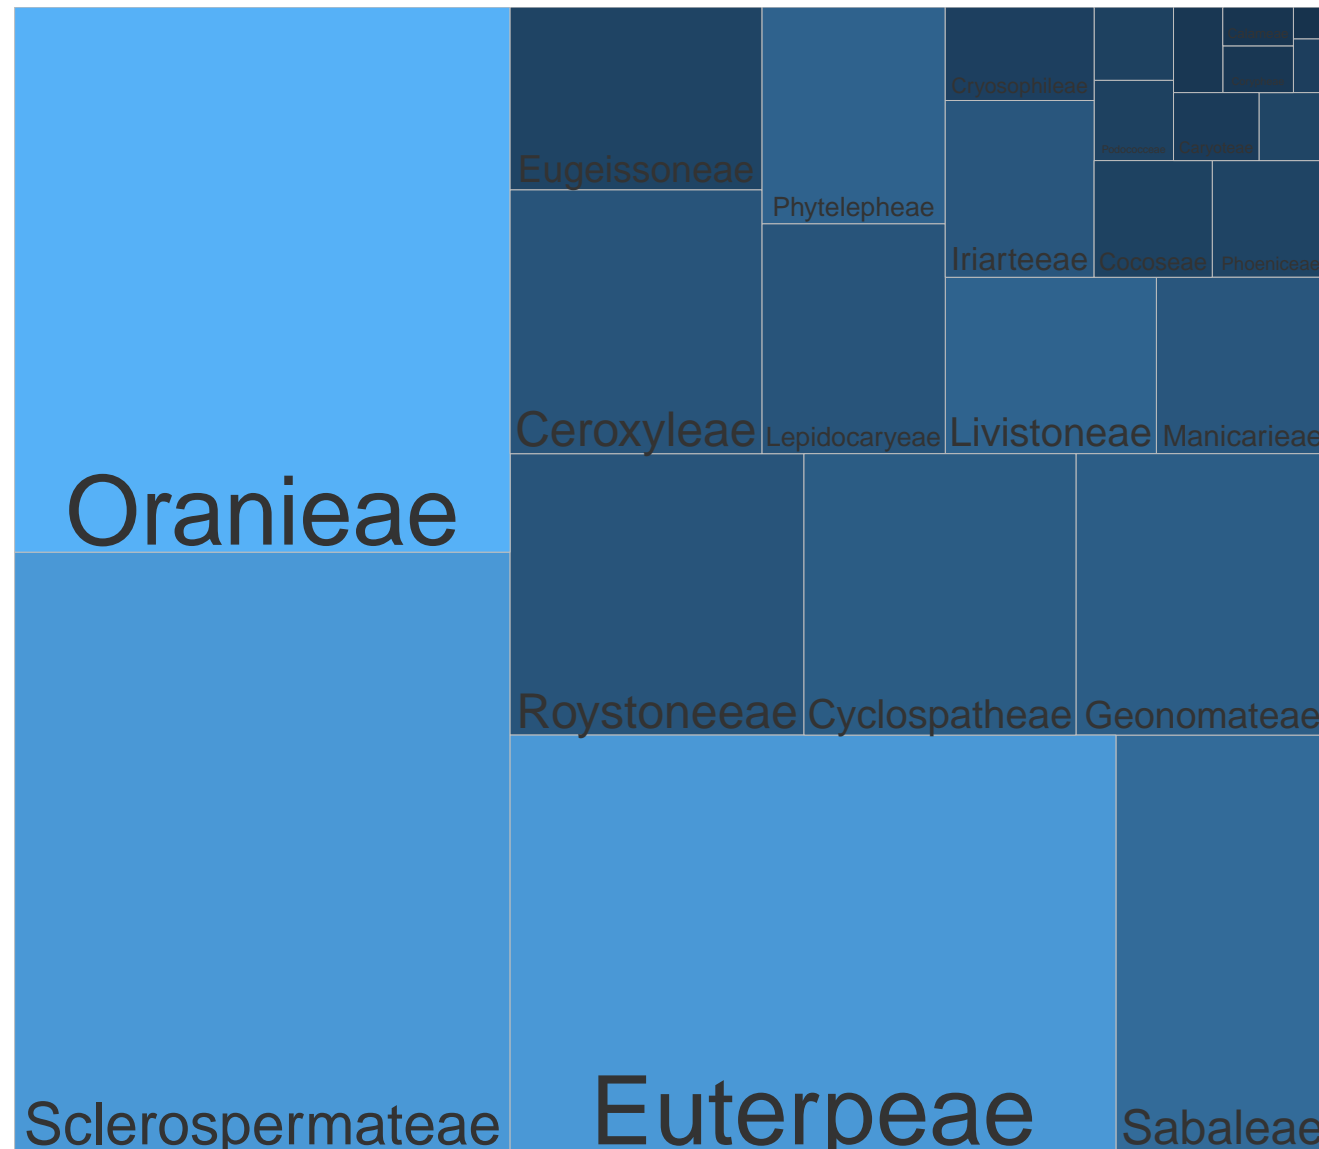

a.

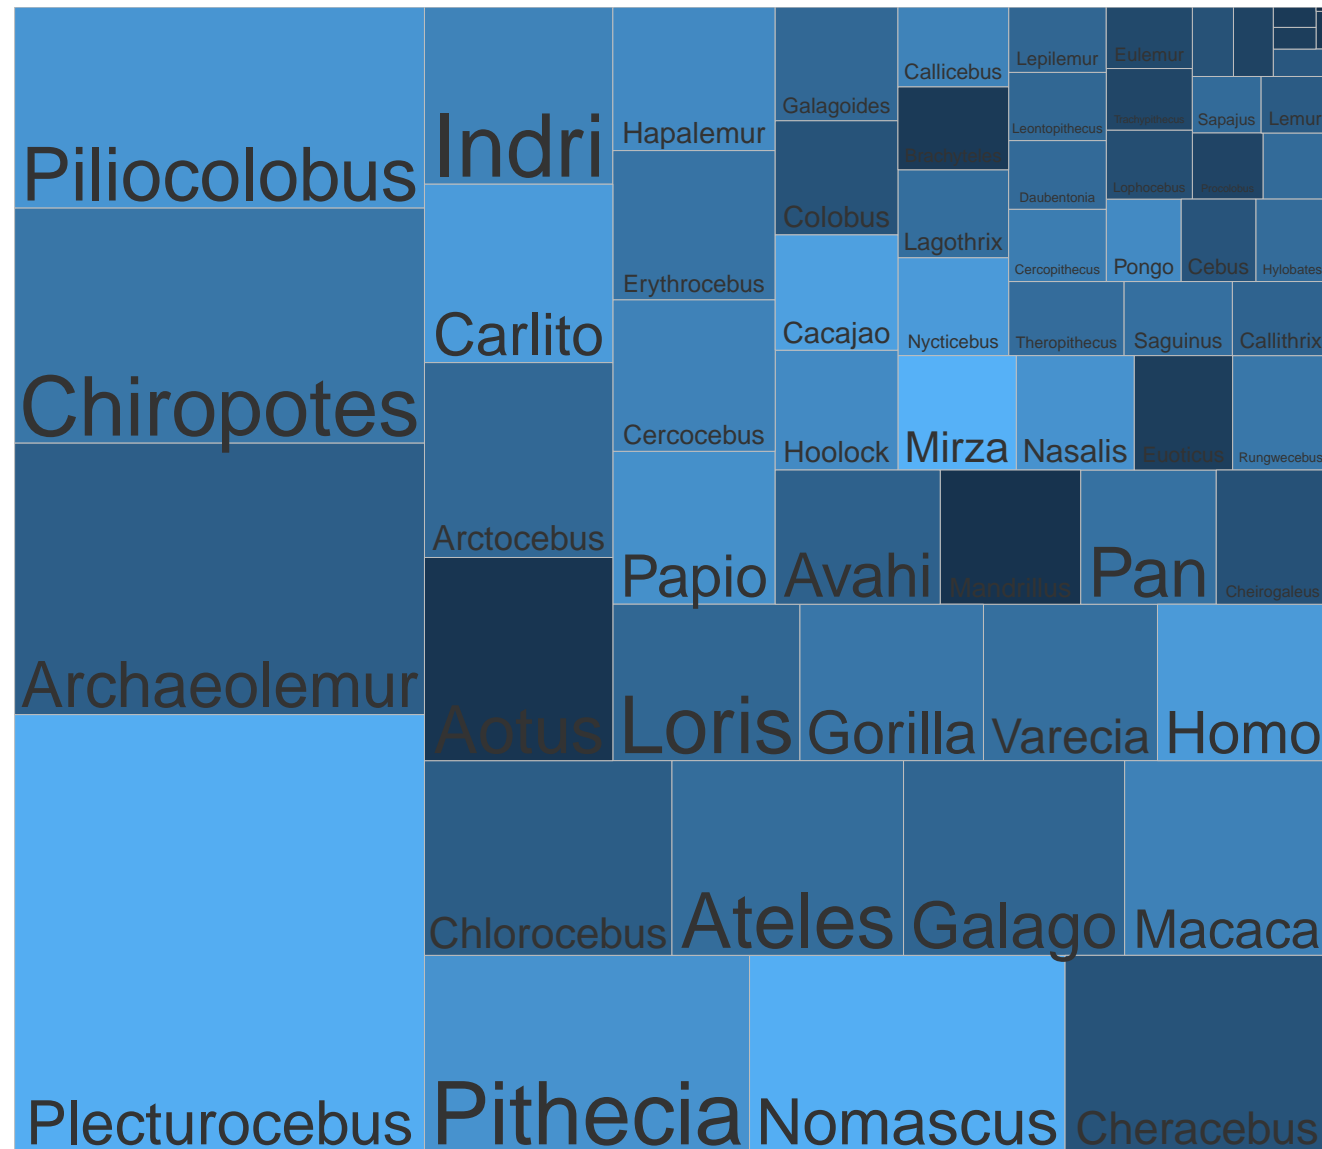

b.

Figure S2. Relative distribution of number of sequences (box size) and clusters (colour) across tribes/genera for palms (a) and primates (b).
